# Supplementary material
Source: Research Square preprint supplement (doi:10.21203/rs.3.rs-8829361/v1)
Supplement: Supplementary file 1 [file 098bcb5abf3251bb04a85128.docx]

**SUPPLEMENTARY MATERIALS**

**Coral rubble facilitates feeding opportunities for invertivorous reef fishes on tropical coral reefs**

Lisa S. Goberdhan1*, Gareth J. Williams1, Shaun K. Wilson2,3, Rodney Melanie4, Nicholas A. J. Graham5

1School of Ocean Sciences, Bangor University, Menai Bridge, Anglesey, LL59 5AB, UK

2Australian Institute of Marine Science, Crawley, Western Australia, Australia

3Ocean Institute, University of Western Australia, Crawley, Western Australia, Australia

4Seychelles Fisheries Authority, Victoria, Mahe, Seychelles

5Lancaster Environment Centre, Lancaster University, Lancaster, LA1 4YQ, UK

[*l.goberdhan@bangor.ac.uk](mailto:*l.goberdhan@bangor.ac.uk)

**Assignment of trophic guilds to invertivorous reef fish species**

**Table S1.** List of invertivorous reef fish species recorded in this study and their corresponding trophic guild assignments (crustacivores, macroinvertivores, microinvertivores, sessile invertivores), based on global gut content synthesis by Parravicini et al. (2020).

| **Species** | **Trophic guild** |
| --- | --- |
| Bodianus axillaris | Macroinvertivore |
| Epibulus insidiator | Crustacivore |
| Halichoeres hortulanus | Macroinvertivore |
| Halichoeres marginatus | Microinvertivore |
| Stethojulis albovittata | Microinvertivore |
| Lutjanus bohar | Crustacivore |
| Lutjanus gibbus | Crustacivore |
| Cephalopholis leopardus | Crustacivore |
| Oxycheilinus digramma | Crustacivore |
| Cheilinus trilobatus | Macroinvertivore |
| Gomphosus caeruleus | Microinvertivore |
| Hemigymnus fasciatus | Microinvertivore |
| Labroides bicolor | Microinvertivore |
| Labroides dimidiatus | Microinvertivore |
| Thalassoma hebraicum | Microinvertivore |
| Lethrinus harak | Crustacivore |
| Centropyge multispinis | Sessile invertivore |
| Chaetodon lunula | Microinvertivore |
| Plectorhinchus orientalis | Macroinvertivore |
| Anampses meleagrides | Microinvertivore |
| Hemigymnus melapterus | Microinvertivore |
| Cantherhines pardalis | Sessile invertivore |
| Macropharyngodon bipartitus | Microinvertivore |
| Monotaxis grandoculis | Macroinvertivore |
| Coris formosa | Macroinvertivore |
| Lethrinus obsoletus | Microinvertivore |
| Zanclus cornutus | Sessile invertivore |
| Pomacanthus semicirculatus | Sessile invertivore |
| Pomacanthus imperator | Sessile invertivore |
| Epinephelus spilotoceps | Crustacivore |
| Mulloidichthys flavolineatus | Macroinvertivore |
| Scolopsis frenatus | Microinvertivore |
| Halichoeres cosmetus | Microinvertivore |
| Parupeneus rubescens | Crustacivore |
| Sufflamen chrysopterum | Microinvertivore |
| Cheilinus fasciatus | Crustacivore |
| Parupeneus cyclostomus | Crustacivore |
| Parupeneus macronemus | Microinvertivore |
| Epinephelus fasciatus | Crustacivore |
| Novaculichthys taeniourus | Macroinvertivore |
| Parupeneus barberinus | Crustacivore |
| Parupeneus ciliatus | Crustacivore |
| Macolor niger | Crustacivore |
| Plectorhinchus schotaf | Macroinvertivore |
| Thalassoma lunare | Microinvertivore |
| Cephalopholis urodeta | Crustacivore |
| Thalassoma hardwicke | Microinvertivore |
| Apolemichthys trimaculatus | Sessile invertivore |
| Halichoeres scapularis | Microinvertivore |
| Epinephelus coeruleopunctatus | Crustacivore |
| Lutjanus rivulatus | Macroinvertivore |
| Epinephelus merra | Crustacivore |
| Lutjanus fulviflamma | Crustacivore |
| Lutjanus kasmira | Crustacivore |
| Lutjanus monostigma | Crustacivore |
| Parupeneus trifasciatus | Crustacivore |
| Lethrinus lentjan | Microinvertivore |
| Diagramma pictum | Macroinvertivore |
| Plectorhinchus gibbosus | Macroinvertivore |

**Categorising benthic regimes for surveyed reefs in inner Seychelles Islands 1994 - 2022**


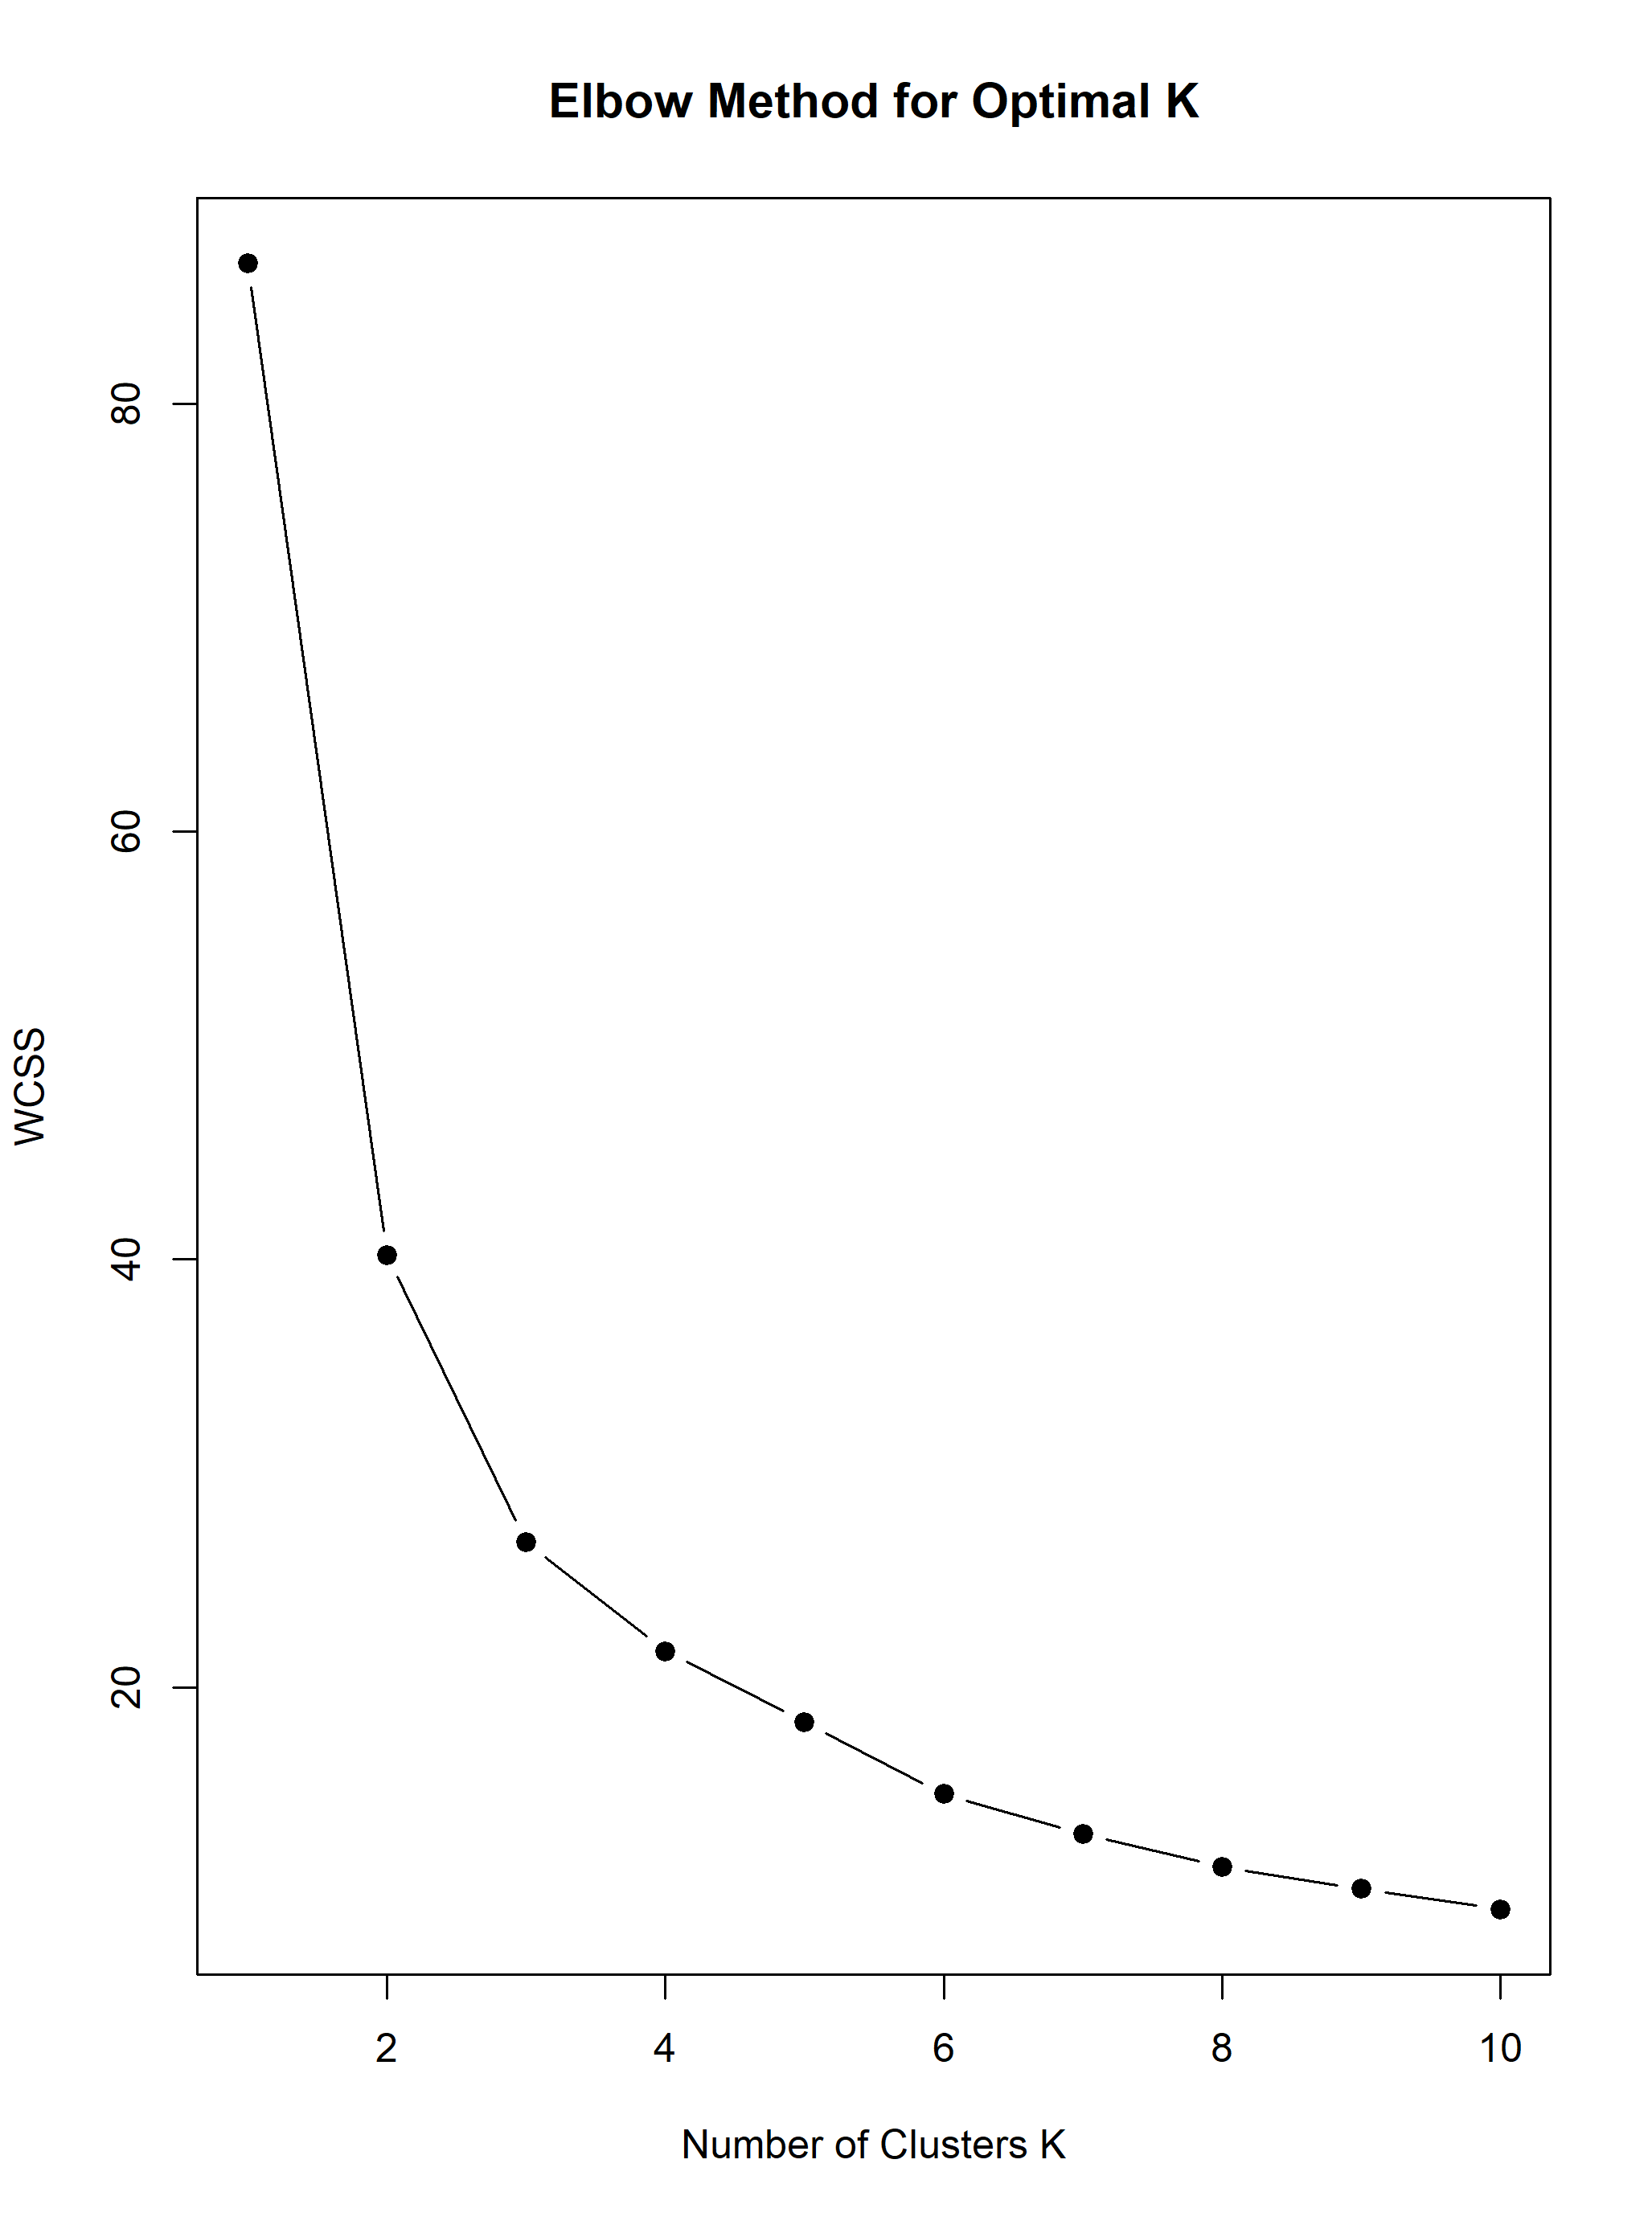


**Supp. Fig. 1.** Elbow method used to identify the optimal number of pre-defined clusters (k). Inflection point inferred at 3 clusters.

**Differences in invertivorous fish community structure across benthic regimes (1994 – 2022) – CAP analysis results**

**Table S2.** Cross validation results of classifying invertivorous reef fish communities to *a prori* defined benthic regimes.

|  | Classified as | | |  | |
| --- | --- | --- | --- | --- | --- |
| Original group | Hard substrate | Macroalgae | Rubble | Total | Correct Classification (%) |
| Hard substrate | 49 | 4 | 7 | 60 | 81.67 |
| Macroalgae | 1 | 20 | 0 | 21 | 95.24 |
| Rubble | 3 | 4 | 38 | 45 | 84.44 |
| Total correct | 49 | 20 | 3 | 14 | 84.92 |

**Differences in invertivorous fish community structure across benthic regimes (1994 – 2022) – PERMANOVA results**

**Table S3.** Summary statistics of PERMANOVA on variation (a) body size, (b) crustacivore abundance, (c) macroinvertivore abundance (d) microinvertivore abundance (e) sessile invertivore abundance among benthic regimes. Significant values in bold.

|  | Factor | df | SS | Pseudo-F | p |
| --- | --- | --- | --- | --- | --- |
| (a) Body size | Benthic regime | 2 | 77.64 | 8.65 | **0.0003** |
|  | Residuals | 123 | 552.21 |  |  |
|  | Total | 125 |  |  |  |
| (b)Crustacivore | Benthic regime | 2 | 6772.2 | 5.90 | **0.0036** |
|  | Residuals | 123 | 70657 |  |  |
|  | Total | 125 |  |  |  |
| (b)Macroinvertivore | Benthic regime | 2 | 1093.4 | 2.63 | 0.07 |
|  | Residuals | 123 | 25592 | 2.63 | 2.63 |
|  | Total | 125 | 61.996 |  |  |
| (d) Microinvertivore | Benthic regime | 2 | 16069 | 6.00 | **0.0026** |
|  | Residuals | 123 | 1.65E+05 |  |  |
|  | Total | 125 | 8577.6 |  |  |
| (d) Sessile invertivore | Benthic regime | 2 | 4957.1 | 13.69 | **0.0001** |
|  | Residuals | 123 | 22262 |  |  |
|  | Total | 125 | 27219 |  |  |

**Relationship between invertivorous fish community structure and coral rubble habitats (2022): Kmeans clustering of benthic surveys in 2022**


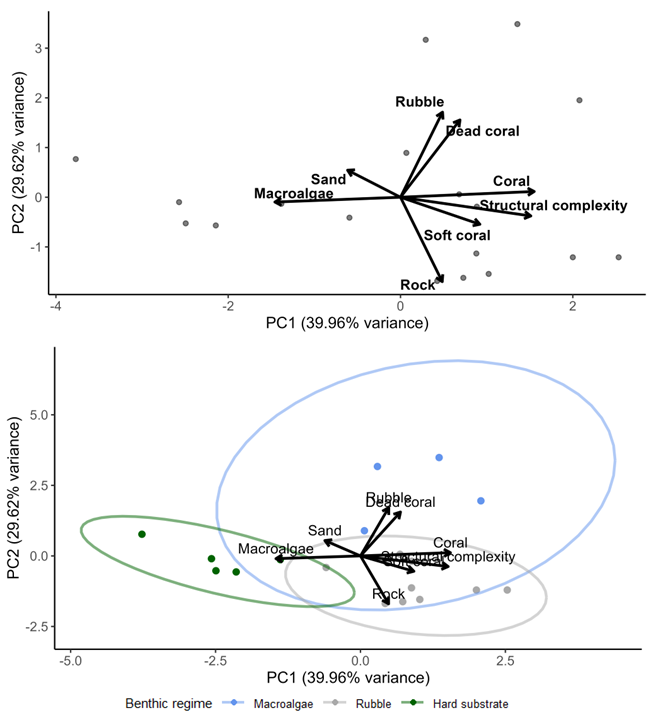


**Supp. Fig. 2** PCA diagram with overlaying K-means clustering of the sites. Green dots (n = 4), blue dots (n = 5), and grey dots (n = 9) represent sites color-coded by its respective benthic regime.

**Table S4.** Mean benthic cover in each benthic regime expressed as a percentage

| Benthic variable | Macroalgae regime  (n =4) | Rubble regime  (n = 5) | Hard substrate regime  (n = 9) |
| --- | --- | --- | --- |
| Coral (%) | 2.48 | 15.30 | 15.20 |
| Sand (%) | 11.80 | 8.28 | 5.00 |
| Rubble (%) | 11.30 | 53.90 | 14.50 |
| Rock (%) | 33.50 | 15.70 | 59.60 |
| Macroalgae (%) | 40.90 | 0.19 | 3.08 |
| Soft coral (%) | 0.03 | 1.51 | 1.51 |
| Dead coral (%) | 0.00 | 5.75 | 1.10 |

**Relationship between invertivorous fish community structure and coral rubble habitats (2022): CAP analysis results**

**Table S5.** CAP results showing cross validation results of classifying reef fish communities to benthic regimes

|  | Classified as | | |  | |
| --- | --- | --- | --- | --- | --- |
| Original group | Hard substrate | Macroalgae | Rubble | Total | Correct Classification (%) |
| Hard substrate | 7 | 0 | 2 | 9 | 77.78 |
| Macroalgae | 0 | 4 | 1 | 5 | 80.00 |
| Rubble | 1 | 0 | 3 | 4 | 75.00 |
| Total correct | 7 | 4 | 3 | 14 | 77.78 |

**Table S6.** Species-specific associations of reef fish and benthic regime based on Spearman’s rank correlation coefficient and position along CAP axes for data in the year 2022.

| Species | CAP1 | CAP2 | Benthic regime-association |
| --- | --- | --- | --- |
| Anampses meleagrides | 0.019654273 | 0.446158364 | Rubble |
| Bodianus axillaris | 0.335122099 | 0.550238852 | Rubble |
| Cantherhines pardalis | 0.242954878 | -0.156329566 | Hard substrate |
| Centropyge multispinis | 0.066333603 | 0.671980244 | Rubble |
| Chaetodon lunula | 0.2533742 | -0.308448442 | Hard substrate |
| Cheilinus trilobatus | -0.001323518 | -0.219681297 | Hard substrate |
| Coris formosa | 0.397762646 | 0.029496017 | Hard substrate |
| Epibulus insidiator | 0.669271157 | -0.001028668 | Hard substrate |
| Epinephelus merra | 0.163796464 | 0.27473292 | Hard substrate |
| Epinephelus spilotoceps | 0.426439361 | 0.059108075 | Hard substrate |
| Gomphosus caeruleus | 0.448713968 | 0.470361715 | Hard substrate |
| Halichoeres hortulanus | 0.359215304 | -0.321656325 | Hard substrate |
| Halichoeres marginatus | 0.004765591 | -0.21419097 | Hard substrate |
| Hemigymnus fasciatus | -0.036156546 | 0.124745306 | Macroalgae |
| Hemigymnus melapterus | 0.327667226 | 0.305925195 | Hard substrate |
| Labroides bicolor | 0.203126203 | 0.581383062 | Rubble |
| Labroides dimidiatus | 0.0395666 | 0.223002062 | Hard substrate |
| Lethrinus harak | 0.094646625 | 0.034495932 | Hard substrate |
| Lethrinus obsoletus | -0.126511758 | 0.216980911 | Macroalgae |
| Lutjanus bohar | 0.408380238 | 0.045753887 | Hard substrate |
| Macropharyngodon bipartitus | -0.32161731 | 0.038405375 | Macroalgae |
| Novaculichthys taeniourus | -0.185681616 | 0.21096026 | Macroalgae |
| Oxycheilinus digramma | 0.35725833 | 0.308505645 | Hard substrate |
| Parupeneus macronemus | -0.474675137 | 0.328938402 | Macroalgae |
| Pomacanthus imperator | 0.411364577 | -0.146912497 | Hard substrate |
| Pomacanthus semicirculatus | 0.189583285 | -0.441390349 | Hard substrate |
| Scolopsis frenatus | -0.105965133 | 0.203587203 | Macroalgae |
| Stethojulis albovittata | -0.443095569 | 0.323840795 | Macroalgae |
| Thalassoma hardwicke | 0 | 0 | NA |
| Thalassoma hebraicum | -0.123768591 | -0.441220605 | Macroalgae |
| Zanclus cornutus | 0.474676395 | 0.024703479 | Hard substrate |
| Epinephelus fasciatus | -0.197570116 | 0.301700142 | Rubble |
| Lethrinus lentjan | -0.191047393 | -0.16730989 | Macroalgae |
| Lutjanus gibbus | 0.375013378 | -0.281189743 | Hard substrate |
| Parupeneus barberinus | -0.254327352 | 0.08430446 | Macroalgae |
| Parupeneus trifasciatus | 0.125608225 | 0.092323296 | Hard substrate |
| Lutjanus fulviflamma | 0.578227571 | -0.416120829 | Hard substrate |
| Parupeneus ciliatus | 0.056197551 | 0.050769063 | Hard substrate |
| Plectorhinchus gibbosus | 0 | 0 | NA |
| Plectorhinchus orientalis | 0.133713202 | -0.490342848 | Hard substrate |
| Parupeneus cyclostomus | 0.114122549 | -0.064360634 | Hard substrate |
| Halichoeres cosmetus | -0.001328242 | 0.204267256 | Rubble |
| Lutjanus monostigma | 0 | 0 | NA |
| Macolor niger | 0.308689327 | -0.220566646 | Hard substrate |
| Plectorhinchus schotaf | 0.241013627 | -0.293532244 | Hard substrate |
| Sufflamen chrysopterum | 0.219639652 | -0.069221691 | Hard substrate |
| Monotaxis grandoculis | -0.040049454 | -0.14593678 | Macroalgae |
| Parupeneus rubescens | -0.360754452 | 0.04985229 | Macroalgae |
| Halichoeres scapularis | -0.09620582 | 0.619212248 | Rubble |
| Mulloidichthys flavolineatus | 0.418774133 | -0.253479634 | Hard substrate |
| Cephalopholis leopardus | -0.019690727 | 0.433002649 | Rubble |
| Thalassoma lunare | -0.107374742 | 0.332201887 | Rubble |
| Cheilinus fasciatus | -0.001328242 | 0.204267256 | Rubble |
| Apolemichthys trimaculatus | -0.092800733 | 0.282376327 | Rubble |
| Cephalopholis urodeta | 0.131028416 | 0.438865609 | Rubble |
| Epinephelus coeruleopunctatus | 0.0424913 | 0.105667631 | Hard substrate |
| Lutjanus rivulatus | 0 | 0 | NA |
| Lutjanus kasmira | 0.095407371 | -0.177881028 | Hard substrate |
| Diagramma pictum | -0.271910118 | -0.031226576 | Macroalgae |

**Table S7.** Summary statistics of permutational analysis of variance (PERMANOVA) testing the effect of rubble disturbance on site-level response variables (n = 17) either present on coral rubble habitats or actively feeding in coral rubble habitats - (a) invertivorous fish community composition present (b) invertivorous fish community composition feeding (c) mean body size of invertivorous fish present (d) mean body size of invertivorous fish feeding (e) standard deviation of invertivorous fish present (f) standard deviation of invertivorous fish feeding (g) crustacivore abundance present (h) crustacivore abundance feeding (i) macroinvertivore abundance present (j) macroinvertivore abundance feeding (k) microinvertivore abundance present (l) microinvertivore abundance feeding (m) sessile invertivore abundance presence (n) sessile invertivore abundance feeding

|  | Factor | df | SS | Pseudo-F | p |
| --- | --- | --- | --- | --- | --- |
| (a) Community composition present | Disturbance | 1 | 4210 | 6.75 | **p < 0.01** |
|  | Location | 16 | 44097 | 4.42 | **p < 0.01** |
|  | Residuals | 16 | 14379.00 |  |  |
|  |  |  |  |  |  |
| (b) Community composition feeding | Disturbance | 1 | 7596.1 | 13.824 | **p < 0.01** |
|  | Location | 16 | 13345 | 1.5179 | **p < 0.05** |
|  | Residuals | 16 | 8792 |  |  |
|  |  |  |  |  |  |
| (c) Mean body size present | Disturbance | 1 | 5704 | 0.82 | 0.39 |
|  | Location | 16 | 191.38 | 2.7368 | **p < 0.01** |
|  | Residuals | 16 | 69.929 |  |  |
|  |  |  |  |  |  |
| (d) Mean body size feeding | Disturbance | 1 | 4.9155 | 3.7388 | p = 0.11 |
|  | Location | 16 | 158.98 | 7.5578 | **p < 0.05** |
|  | Residuals | 16 | 623.65 |  |  |
|  |  |  |  |  |  |
| (e) SD body size present | Disturbance | 1 | 23.94 | 9.5581 | **p < 0.01** |
|  | Location | 16 | 65.101 | 1.6245 | 0.17 |
|  | Residuals | 16 | 40.076 |  |  |
|  |  |  |  |  |  |
| (f) SD body size feeding | Disturbance | 1 | 72.322 | 4.325 | **p < 0.05** |
|  | Location | 16 | 615.75 | 2.3014 | 0.17 |
|  | Residuals | 16 | 83.61 |  |  |
|  |  |  |  |  |  |
| (g) Crustacivore abundance present | Disturbance | 1 | 3.2426 | 13.93 | **p < 0.01** |
|  | Location | 16 | 32.88 | 10.974 | **p < 0.05** |
|  | Residuals | 16 | 21.12 | 5.2157 |  |
|  |  |  |  |  |  |
| (h) Crustacivore abundance feeding | Disturbance | 1 | 0.11765 | 8.7273 | **p < 0.01** |
|  | Location | 16 | 0.34641 | 1.6061 | 0.1824 |
|  | Residuals | 16 | 1.94 |  |  |
|  |  |  |  |  |  |
| (i) Macroinvertivore abundance present | Disturbance | 1 | 2.844 | 19.948 | **p < 0.01** |
|  | Location | 16 | 0.86642 | 6.0774 | **p < 0.01** |
|  | Residuals | 16 | 2.281 |  |  |
|  |  |  |  |  |  |
| (j) Macroinvertivore abundance feeding | Disturbance | 1 | 2.9412 | 13.873 | **p < 0.01** |
|  | Location | 16 | 4.7647 | 1.4046 | 0.2205 |
|  | Residuals | 16 | 3.3922 |  |  |
|  |  |  |  |  |  |
| (k) Microinvertivore abundance present | Disturbance | 1 | 15.559 | 21.706 | **p < 0.01** |
|  | Location | 16 | 29.083 | 2.5358 | **p < 0.01** |
|  | Residuals | 16 | 11.469 |  |  |
|  |  |  |  |  |  |
| (l) Microinvertivore abundance feeding | Disturbance | 1 | 9.8856 | 18.36 | **p < 0.01** |
|  | Location | 16 | 9.8301 | 1.14 | 0.39 |
|  | Residuals | 16 | 8.6144 |  |  |
|  |  |  |  |  |  |
| (m) Sessile invertivore abundance present | Disturbance | 1 | 0.51062 | 8.1433 | **p < 0.01** |
|  | Location | 16 | 2.0817 | 2.0749 | 0.08 |
|  | Residuals | 16 | 1.0033 |  |  |
|  |  |  |  |  |  |
| (n) Sessile invertivore abundance feeding | Disturbance | 1 | 0.081699 | 4.2553 | 0.06 |
|  | Location | 16 | 0.30719 | 1.00 | 0.43 |
|  | Residuals | 16 | 0.30719 |  |  |

**Table S8.** Summary statistics of PERMANOVA testing the effect of benthic regime on pre-disturbance site-level response variables either present on coral rubble habitats or actively feeding in coral rubble habitats - (a) invertivorous fish community composition present (b) invertivorous fish community composition feeding (c) mean body size of invertivorous fish present (d) mean body size of invertivorous fish feeding (e) standard deviation of invertivorous fish present (f) standard deviation of invertivorous fish feeding (g) crustacivore abundance present (h) crustacivore abundance feeding (i) macroinvertivore abundance present (j) macroinvertivore abundance feeding (k) microinvertivore abundance present (l) microinvertivore abundance feeding (m) sessile invertivore abundance presence (n) sessile invertivore abundance feeding

|  | Factor | df | SS | Pseudo-F | p |
| --- | --- | --- | --- | --- | --- |
| (a) Community composition present | Benthic regime | 2 | 2302.7 | 0.69154 | 0.7967 |
|  | Residuals | 14 | 38986.00 |  |  |
|  |  |  |  |  |  |
| (b) Community composition feeding | Benthic regime | 2 | 1503.5 | 2.2848 | **p = 0.0498** |
|  | Residuals | 14 | 4606.2 |  |  |
|  |  |  |  |  |  |
| (c) Mean body size present | Benthic regime | 2 | 62.425 | 3.8079 | **p < 0.05** |
|  | Residuals | 14 | 114.76 |  |  |
|  |  |  |  |  |  |
| (d) Mean body size feeding | Benthic regime | 2 | 16.252 | 2.7791 | 0.3 |
|  | Residuals | 14 | 8.7719 |  |  |
|  |  |  |  |  |  |
| (e) SD body size present | Benthic regime | 2 | 1.1018 | 0.12028 | 0.884 |
|  | Residuals | 14 | 64.123 |  |  |
|  |  |  |  |  |  |
| (f) SD body size feeding | Benthic regime | 2 | 0.95579 | 0.15355 | 1 |
|  | Residuals | 14 | 9.3368 |  |  |
|  |  |  |  |  |  |
| (g) Crustacivore abundance present | Benthic regime | 2 | 1.65 | 0.13835 | 0.8886 |
|  | Residuals | 14 | 2.0958 |  |  |
|  |  |  |  |  |  |
| (h) Crustacivore abundance feeding | Benthic regime | 2 | 0.0073529 | 0.52941 | 1.00 |
|  | Residuals | 14 |  |  |  |
|  |  |  |  |  |  |
| (i) Macroinvertivore abundance present | Benthic regime | 2 | 0.17059 | 0.25169 | 0.8173 |
|  | Residuals | 14 | 4.7444 |  |  |
|  |  |  |  |  |  |
| (j) Macroinvertivore abundance feeding | Benthic regime | 2 | 0.19118 | 16.059 | **p < 0.01** |
|  | Residuals | 14 | 0.083333 |  |  |
|  |  |  |  |  |  |
| (k) Microinvertivore abundance present | Benthic regime | 2 | 2.7081 | 1.3719 | 0.2844 |
|  | Residuals | 14 | 13.818 |  |  |
|  |  |  |  |  |  |
| (l) Microinvertivore abundance feeding | Benthic regime | 2 | 0.035294 | 0.18843 | 0.88 |
|  | Residuals | 14 | 1.3111 |  |  |
|  |  |  |  |  |  |
| (m) Sessile invertivore abundance present | Benthic regime | 2 | 0.17549 | 2.799 | 0.0979 |
|  | Residuals | 14 |  |  |  |
|  |  |  |  |  |  |
| (n) Sessile invertivore abundance feeding | Benthic regime | 2 | 0.00 | Denominator is 0 |  |
|  | Residuals | 14 | 0.00 |  |  |

**Table S9.** Summary statistics of PERMANOVA testing the effect of benthic on post-disturbance site-level response variables either present on coral rubble habitats or actively feeding in coral rubble habitats - (a) invertivorous fish community composition present (b) invertivorous fish community composition feeding (c) mean body size of invertivorous fish present (d) mean body size of invertivorous fish feeding (e) standard deviation of invertivorous fish present (f) standard deviation of invertivorous fish feeding (g) crustacivore abundance present (h) crustacivore abundance feeding (i) macroinvertivore abundance present (j) macroinvertivore abundance feeding (k) microinvertivore abundance present (l) microinvertivore abundance feeding (m) sessile invertivore abundance presence (n) sessile invertivore abundance feeding

|  | Factor | df | SS | Pseudo-F | p |
| --- | --- | --- | --- | --- | --- |
| (a) Community composition present | Benthic regime | 2 | 3096.7 | 0.85465 | 0.6602 |
|  | Residuals | 14 | 25364 |  |  |
|  |  |  |  |  |  |
| (b) Community composition feeding | Benthic regime | 2 | 2004.2 | 0.82123 | 0.6151 |
|  | Residuals | 14 | 17083 |  |  |
|  |  |  |  |  |  |
| (c) Mean body size present | Benthic regime | 2 | 5.4893 | 0.48863 | 0.6163 |
|  | Residuals | 14 | 78.638 |  |  |
|  |  |  |  |  |  |
| (d) Mean body size feeding | Benthic regime | 2 | 13.752 | 0.75927 | 0.487 |
|  | Residuals | 14 | 126.78 |  |  |
|  |  |  |  |  |  |
| (e) SD body size present | Benthic regime | 2 | 2.9386 | 0.55574 | 0.5812 |
|  | Residuals | 14 | 37.014 |  |  |
|  |  |  |  |  |  |
| (f) SD body size feeding | Benthic regime | 2 | 1.8564 | 0.12523 | 0.8886 |
|  | Residuals | 14 | 148.24 |  |  |
|  |  |  |  |  |  |
| (g) Crustacivore abundance present | Benthic regime | 2 | 1.2967 | 0.71162 | 0.5641 |
|  | Residuals | 14 | 12.756 |  |  |
|  |  |  |  |  |  |
| (h) Crustacivore abundance feeding | Benthic regime | 2 | 0.074183 | 1.3546 | 0.3742 |
|  | Residuals | 14 | 0.38333 |  |  |
|  |  |  |  |  |  |
| (i) Macroinvertivore abundance present | Benthic regime | 2 | 0.73709 | 0.49178 | 0.6224 |
|  | Residuals | 14 | 10.492 |  |  |
|  |  |  |  |  |  |
| (j) Macroinvertivore abundance feeding | Benthic regime | 2 | 1.5824 | 1.76 | 0.21 |
|  | Residuals | 14 | 6.3 |  |  |
|  |  |  |  |  |  |
| (k) Microinvertivore abundance present | Benthic regime | 2 | 0.37892 | 0.11217 | 0.9003 |
|  | Residuals | 14 | 23.647 |  |  |
|  |  |  |  |  |  |
| (l) Microinvertivore abundance feeding | Benthic regime | 2 | 1.3397 | 0.59511 | 0.5897 |
|  | Residuals | 14 | 15.758 |  |  |
|  |  |  |  |  |  |
| (m) Sessile invertivore abundance present | Benthic regime | 2 | 0.16364 | 0.49655 | 0.6103 |
|  | Residuals | 14 |  |  |  |
|  |  |  |  |  |  |
| (n) Sessile invertivore abundance feeding | Benthic regime | 2 | 0.072712 | 0.93967 | 0.56 |
|  | Residuals | 14 | 0.54167 |  |  |
